# Supplementary material
Source: PubMed Central journal article supplement (PMC5738465)
Supplement: NIHMS926567-supplement-Supl.pdf [file NIHMS926567-supplement-Supl.pdf]

Supplemental Table S1. Population characteristics for neighborhood socioeconomic quintiles by principal component analysis and racial/ethnic group for 2000 (census tracts =7049) census data for California

| Census characteristics                        | 2000                      |         |         |         |         |
|-----------------------------------------------|---------------------------|---------|---------|---------|---------|
|                                               | SES quintile <sup>a</sup> |         |         |         |         |
|                                               | Q1                        | Q2      | Q3      | Q4      | Q5      |
| Mean years of education                       | 11,43                     | 12,84   | 13,68   | 14,42   | 15,05   |
| % Without high school diploma (age ≥ 25 yr)   | 53%                       | 31%     | 20%     | 12%     | 6%      |
| % With college degree (age ≥ 25 yr)           | 11%                       | 21%     | 30%     | 43%     | 60%     |
| Median household income (\$)                  | 28,335                    | 37,988  | 47,775  | 60,232  | 89,254  |
| % Below 200% of federal poverty line          | 62%                       | 41%     | 28%     | 18%     | 10%     |
| % Blue-collar workers (age ≥ 16 yr)           | 17%                       | 15%     | 13%     | 10%     | 6%      |
| % Unemployed (age ≥ 16 yr)                    | 8%                        | 5%      | 4%      | 3%      | 2%      |
| Median gross rent per housing unit (\$)       | 575                       | 686     | 808     | 984     | 1,327   |
| Median home value per single family home (\$) | 119,660                   | 143,293 | 185,835 | 257,468 | 467,621 |
| Race/ethnicity (mean%)                        |                           |         |         |         |         |
| non-Hispanic White                            | 18%                       | 40%     | 53%     | 62%     | 71%     |
| African-American                              | 10%                       | 8%      | 6%      | 5%      | 2%      |
| Hispanic                                      | 64%                       | 38%     | 26%     | 16%     | 9%      |
| Asian/Pacific Islander                        | 6%                        | 9%      | 10%     | 13%     | 15%     |

<sup>a</sup> Q1=lower SES, Q5=higher SES
